# Supplementary material for: Quantitative Risk Evaluation of Antimicrobial-Resistant Vibrio parahaemolyticus Isolated from Farmed Grey Mullets in Singapore
Source: MDPI journal article supplement (doi:10.3390/pathogens12010093), 2023-01-05
Supplement: s1 [file s1]

# Supplementary Information

Table S1 – Confirmation of antimicrobial resistance of *Vibrio parahemolyticus* bacterial isolates via disc diffusion method.

|                                     | Treatment  |              |              |
|-------------------------------------|------------|--------------|--------------|
|                                     | Ampicillin | Penicillin G | Tetracycline |
| Total bacterial isolates counts     | 27         | 14           | 5            |
| Total resistant isolates counts (%) | 25 (92.6)  | 14 (100)     | 4 (80)       |

Table S2 – Antimicrobial susceptibility profile of *V. parahaemolyticus* isolates via disc diffusion method.

| Antibiotics                           | Interpretive results (farm) |                  |               | Interpretive results (retail) |                  |               |
|---------------------------------------|-----------------------------|------------------|---------------|-------------------------------|------------------|---------------|
|                                       | Sensitive (%)               | Intermediate (%) | Resistant (%) | Sensitive (%)                 | Intermediate (%) | Resistant (%) |
| Ampicillin (10 µg)                    | 4 (9.80)                    | 10 (24.4)        | 27 (65.8)     | 2 (3.17)                      | 8 (12.7)         | 53 (84.1)     |
| Ampicillin/sulbactam (20 µg)          | 35 (85.4)                   | -                | 6 (14.6)      | 62 (98.4)                     | -                | 1 (1.60)      |
| Penicillin G (10 unit)                | -                           | -                | 41 (100)      | -                             | 1 (1.60)         | 62 (98.4)     |
| Tetracycline (30 µg)                  | 34 (82.9)                   | 7 (17.1)         | -             | 58 (92.1)                     | 1 (1.60)         | 4 (6.30)      |
| Cefotaxime (30 µg)                    | 34 (82.9)                   | 7 (17.1)         | -             | 57 (90.5)                     | 6 (9.50)         | -             |
| Ciprofloxacin (5 µg)                  | 31 (75.6)                   | 10 (24.4)        | -             | 57 (90.5)                     | 6 (9.50)         | -             |
| Sulfamethoxazole/Trimethoprim (25 µg) | 41 (100)                    | -                | -             | 63 (100)                      | -                | -             |
| Chloramphenicol (30 µg)               | 41 (100)                    | -                | -             | 63 (100)                      | -                | -             |

Table S3 – Standard errors of occurrence and concentration data of haemolytic *V. parahaemolyticus* within the farm-to-home and retail-to-home chain scenarios.

|                             |                          |                 | Farm-to-home   |            |              |              | Retail-to-home |            |              |              |
|-----------------------------|--------------------------|-----------------|----------------|------------|--------------|--------------|----------------|------------|--------------|--------------|
|                             |                          |                 | Unsupplemented | Ampicillin | Penicillin G | Tetracycline | Unsupplemented | Ampicillin | Penicillin G | Tetracycline |
|                             | Occurrence (Farm/Retail) |                 | 5.46E-05       | 1.98E-05   | 2.32E-05     | N.A.         | 5.44E-05       | 5.14E-05   | 2.99E-05     | 6.45E-05     |
| Concentration<br>(LogCFU/g) | Farm                     | Pre-harvest     | 6.92E-04       | 4.52E-04   | 2.00E-04     | N.A.         | N.A.           | N.A.       | N.A.         | N.A.         |
|                             |                          | Post-harvest    | 6.62E-04       | 4.74E-04   | 2.20E-04     | N.A.         | N.A.           | N.A.       | N.A.         | N.A.         |
|                             | Retail                   | Retail-start    | 6.62E-04       | 4.73E-04   | 2.23E-04     | N.A.         | 4.19E-04       | 5.68E-04   | 6.60E-04     | 6.78E-04     |
|                             |                          | Retail-end      | 6.68E-04       | 4.79E-04   | 2.29E-04     | N.A.         | 4.28E-04       | 5.66E-04   | 6.65E-04     | 6.76E-04     |
|                             | Home                     | Home            | 6.69E-04       | 4.78E-04   | 2.18E-04     | N.A.         | 4.39E-04       | 5.72E-04   | 6.79E-04     | 6.66E-04     |
|                             | Preparation              | Average Washing | 7.02E-04       | 2.36E-04   | 1.27E-04     | N.A.         | 5.51E-04       | 6.27E-04   | 7.08E-04     | 5.53E-04     |
|                             |                          | Washing         | 6.67E-04       | 1.73E-04   | 3.79E-05     | N.A.         | 4.82E-04       | 5.96E-04   | 6.46E-04     | 4.54E-04     |
|                             |                          | No washing      | 7.55E-04       | 5.13E-04   | 2.45E-04     | N.A.         | 4.91E-04       | 6.78E-04   | 7.14E-04     | 6.37E-04     |
|                             | Cooking                  | Average Washing | 2.60E-04       | 2.70E-05   | 2.47E-06     | N.A.         | 1.38E-04       | 1.51E-04   | 2.61E-04     | 1.18E-04     |
|                             |                          | Washing         | 2.39E-04       | 1.20E-05   | 1.33E-07     | N.A.         | 1.21E-04       | 1.53E-04   | 2.06E-04     | 8.87E-05     |
|                             |                          | No washing      | 4.87E-04       | 4.20E-05   | 4.16E-06     | N.A.         | 2.65E-04       | 3.24E-04   | 3.81E-04     | 2.21E-04     |

Table S4 – Standard errors of risk estimates data across all scenarios.

|                |            | Farm to home             |                         |                    | Retail to home           |                         |                    |
|----------------|------------|--------------------------|-------------------------|--------------------|--------------------------|-------------------------|--------------------|
|                |            | P <sub>ill,serving</sub> | P <sub>ill,yearly</sub> | N <sub>cases</sub> | P <sub>ill,serving</sub> | P <sub>ill,yearly</sub> | N <sub>cases</sub> |
| Unsupplemented | Average    | 5.28E-06                 | 5.98E-05                | 5.39E-01           | 8.36E-07                 | 3.62E-05                | 3.27E-01           |
|                | Washing    | 4.19E-06                 | 5.76E-05                | 5.19E-01           | 6.89E-07                 | 3.26E-05                | 2.94E-01           |
|                | No washing | 1.13E-05                 | 1.18E-04                | 1.06E-00           | 3.83E-06                 | 8.63E-05                | 7.78E-01           |
| Ampicillin     | Average    | 2.87E-08                 | 6.04E-06                | 5.44E-02           | 1.03E-06                 | 3.37E-05                | (3.03E-01          |
|                | Washing    | 6.04E-09                 | 2.60E-06                | 2.34E-02           | 7.17E-07                 | 3.51E-05                | 3.16E-01           |
|                | No washing | 8.38E-08                 | 1.07E-05                | 9.65E-02           | 3.66E-06                 | 7.75E-05                | 6.99E-01           |
| Penicillin G   | Average    | 8.89E-10                 | 6.02E-07                | 5.43E-03           | 2.98E-06                 | 6.63E-05                | 5.98E-01           |
|                | Washing    | 4.14E-11                 | 3.25E-08                | 2.93E-04           | 1.76E-06                 | 4.58E-05                | 4.13E-01           |
|                | No washing | 1.79E-09                 | 1.37E-06                | 1.24E-02           | 7.83E-06                 | 1.12E-04                | 1.01               |
| Tetracycline   | Average    | N.A.                     | N.A.                    | N.A.               | 7.80E-07                 | 2.05E-05                | 1.85E-01           |
|                | Washing    | N.A.                     | N.A.                    | N.A.               | 4.14E-07                 | 2.07E-05                | 1.87E-01           |
|                | No washing | N.A.                     | N.A.                    | N.A.               | 2.53E-06                 | 6.29E-05                | 5.67E-01           |
